# Supplementary material for: Evaluating Clinical Genome Sequence Analysis by Watson for Genomics
Source: Front Med (Lausanne). 2018 Nov 9;5:305. doi: 10.3389/fmed.2018.00305 (PMC6237914; doi:10.3389/fmed.2018.00305)
Supplement: Supplementary file 3 [file Table_3.XlSX]

## Sheet: Sheet1
Supplementary Table S3. List of identified mutations after SNP elimination.
Patient	Chr	Position	Reference	Observed	Gene
2	2	209113113	G	A	IDH1
	5	35873647	T	A	IL7R
	10	123279562	C	A	FGFR2
3	1	120548095	C	T	NOTCH2
	17	37879658	G	A	ERBB2
5	7	55268963	T	C	EGFR
	17	7577570	C	T	TP53
6	2	212587118	G	A	ERBB4
	17	7578478	G	C	TP53
	17	37864776	G	A	ERBB2
	17	41226540	T	C	BRCA1
10	2	29456531	C	T	ALK
	17	29670047	G	C	NF1
11	13	32914472	C	T	BRCA2
	17	7578235	T	C	TP53
12	5	35876272	T	C	IL7R
	17	7578406	C	T	TP53
	17	12011128	G	T	MAP2K4
14	3	178936091	G	A	PIK3CA
	6	117709135	A	T	ROS1
16	8	32617801	G	A	NRG1
21	17	7578190	T	C	TP53
22	1	162740165	A	G	DDR2
	6	161491746	A	G	MAP3K4
23	2	212578302	C	T	ERBB4
25	16	3778116	G	A	CREBBP
	17	7577124	C	T	TP53
26	1	27092740	G	-	ARID1A
	9	139391840	G	T	NOTCH1
	13	32907420	-	A	BRCA2
27	7	140481447	T	G	BRAF
	14	105246551	C	T	AKT1
28	2	212251634	C	T	ERBB4
	9	135786904	A	G	TSC1
	14	105246551	C	T	AKT1
29	9	98240437	G	C	PTCH1
30	17	37881000	G	T	ERBB2
32	3	178936092	A	T	PIK3CA
	19	15311613	C	T	NOTCH3
33	16	3900665	G	T	CREBBP
	17	7578406	C	T	TP53
36	2	30142978	C	A	ALK
	2	111881355	G	C	BCL2L11
	2	215595164	G	A	BARD1
	6	117684017	G	C	ROS1
	7	55233039	G	T	EGFR
	9	21971111	G	A	CDKN2A
	13	32907035	CTTGAAT	TATCCTAA	BRCA2
	18	48591925	G	T	SMAD4
	17	7578406	C	T	TP53
37	17	7577114	C	T	TP53
38	6	117710753	T	C	ROS1
40	7	148529785	T	C	EZH2
	9	98222037	T	G	PTCH1
	12	56482425	G	A	ERBB3
	19	11105651	G	A	SMARCA4
41	3	41280704	G	A	CTNNB1
	15	99442822	C	T	IGF1R
42	17	7577509	C	T	TP53
45	7	55238087	C	T	EGFR
46	3	178936091	G	A	PIK3CA
	5	149504392	G	A	PDGFRB
47	9	135786904	A	G	TSC1
	17	7577120	C	T	TP53
48	17	7577097	C	A	TP53
	17	7578263	G	A	TP53
50	3	178936082	G	A	PIK3CA
	12	25398285	C	G	KRAS
	15	66727483	G	A	MAP2K1
	19	1223125	C	G	STK11
52	3	52588791	G	T	PBRM1
	4	153244259	T	C	FBXW7
	5	35876182	A	G	IL7R
	6	117650532	C	G	ROS-1
	15	90631594	G	T	IDH2
	17	7577536	T	C	TP53
53	2	215595164	G	A	BARD1
56	2	29917716	C	T	ALK
	9	133760094	C	T	ABL1
	9	139391840	G	T	NOTCH1
	9	139401233	C	T	NOTCH1
	13	32954009	C	T	BRCA2
	17	7578412	A	C	TP53
58	13	32906546	T	C	BRCA2
	13	32953568	C	T	BRCA2
	17	7579542	C	G	TP53
59	2	209110118	G	T	IDH1
	3	178952085	A	G	PIK3CA
	5	149513524	G	T	PDGFRB
60	7	116397534	A	G	MET
	9	135786904	A	G	TSC1
	9	139390878	G	A	NOTCH1
	13	32915129	T	A	BRCA2
61	3	47079245	T	C	SETD2
	3	178952085	A	G	PIK3CA
62	22	29091722	C	T	CHEK2
63	2	215593520	G	C	BARD1
	4	55156573	A	G	PDGFRA
	11	108122686	T	-	ATM
	11	108206571	G	A	ATM
	12	25398284	C	T	KRAS
65	1	11269419	C	G	MTOR
	17	7573976	-	A	TP53
	19	15295112	C	A	NOTCH3
66	1	27105685	G	-	ARID1A
	1	120548095	C	T	NOTCH2
	3	41268766	A	C	CTNNB1
	3	52436675	T	A	BAP1
	3	178952085	A	G	PIK3CA
	5	176517762	C	G	FGFR4
67	2	29754842	G	T	ALK
	2	209113135	C	T	IDH1
	7	148525904	C	G	EZH2
	9	98209328	T	C	PTCH1
	9	133760471	A	G	ABL1
	9	135786904	A	G	TSC1
	12	56480437	A	G	ERBB3
	16	3929908	T	C	CREBBP
70	2	178098960	C	G	NFE2L2
	3	178936082	G	A	PIK3CA
	12	25398284	C	T	KRAS
	15	99250871	C	T	IGF1R
	17	7574023	C	T	TP53
	17	40474444	T	C	STAT3
71	1	115256530	G	T	NRAS
	3	47163843	C	T	SETD2
	3	178916876	G	A	PIK3CA
	3	178937410	G	A	PIK3CA
	17	37866444	C	T	ERBB2
72	12	25398220	A	C	KRAS
74	17	37883100	C	G	ERBB2
75	2	29450509	C	T	ALK
	13	28622544	T	A	FLT3
	17	7578271	T	A	TP53
	19	1221954	T	G	STK11
76	9	133759509	C	T	ABL1
	13	32890650	G	A	BRCA2
	13	32900675	G	A	BRCA2
77	7	148524338	G	A	EZH2
	7	148524346	C	T	EZH2
	9	21970901	C	A	CDKN2A
	17	7578525	G	C	TP53
79	1	27100389	G	T	ARID1A
	1	27100390	G	T	ARID1A
	2	29416671	G	A	ALK
	3	52584765	G	A	PBRM1
	17	7577099	C	A	TP53
	19	10602836	C	G	KEAP1
81	9	135786904	A	G	TSC1
	17	7576910	G	-	TP53
82	1	27023367	C	T	ARID1A
	3	52441192	T	G	BAP1
	4	55561764	G	A	KIT
	5	112102099	G	A	APC
	6	161469851	G	T	MAP3K4
	13	32912441	A	G	BRCA2
	19	1223125	C	G	STK11
	17	29667664	G	T	NF1
	22	29107899	C	A	CHEK2
83	6	161470251	G	T	MAP3K4
	12	25398284	C	A	KRAS
	17	7577570	C	T	TP53
84	7	128852035	C	T	SMO
	16	3824631	G	A	CREBBP
	19	1221319	C	T	STK11
	19	1223125	C	G	STK11
85	9	139391593	C	T	NOTCH1
88	9	135786904	A	G	TSC1
	17	7578242	C	A	TP53
89	17	7578550	G	A	TP53
	17	41209095	G	A	BRCA1
	19	10599892	G	A	KEAP1
90	2	29543634	C	T	ALK
	17	7577539	G	A	TP53
91	17	7578534	C	G	TP53
92	12	25398284	C	T	KRAS
93	4	1795720	C	T	FGFR3
	13	32913407	G	A	BRCA2
97	1	120459122	C	T	NOTCH2
	1	162722887	A	G	DDR2
	13	32921033	G	C	BRCA2
	13	49050979	G	C	RB1
	16	23646282	G	T	PALB2
	17	7577535	C	A	TP53
98	3	178936082	G	A	PIK3CA
	5	56168785	C	T	MAP3K1
	5	56183214	T	A	MAP3K1
	9	135781380	C	T	TSC1
	9	139401233	C	T	NOTCH1
99	12	46243514	C	-	ARID2
	17	7577559	G	A	TP53
100	2	212483942	T	C	ERBB4
101	17	7578406	C	T	TP53
102	1	27094377	G	A	ARID1A
	1	27100176	C	-	ARID1A
	2	216261919	A	G	FN1
	5	112174002	G	T	APC
	9	5081809	A	G	JAK2
	9	98211549	G	-	PTCH1
	10	104849633	GT	-	NT5C2
	12	46205234	-	G	ARID2
	13	32907420	-	A	BRCA2
	16	347797	C	T	AXIN1
	17	37866356	G	A	ERBB2
103	7	148524346	C	T	EZH2
	9	135786904	A	G	TSC1
104	2	212568853	G	A	ERBB4
	17	7574002	C	-	TP53
	19	10597491	C	T	KEAP1
105	4	153247288	C	A	FBXW7
	17	7578239	C	A	TP53
108	3	47079245	T	C	SETD2
	5	112116568	G	-	APC
	17	7578534	C	G	TP53
111	17	7578527	A	-	TP53
112	4	153244091	C	T	FBXW7
	5	56161689	C	T	MAP3K1
	9	5078334	T	C	JAK2
	12	25380276	T	A	KRAS
	19	11101825	G	A	SMARCA4
	19	17943502	C	T	JAK3
116	5	112175216	-	A	APC
	9	135786904	A	G	TSC1
	16	3778717	T	G	CREBBP
	17	7578217	G	A	TP53
120	3	178936091	G	A	PIK3CA
	19	1223125	C	G	STK11
127	4	55151639	T	G	PDGFRA
	13	32937474	A	G	BRCA2
129	4	55602758	G	C	KIT
131	5	56177584	C	T	MAP3K1
	10	43596033	G	A	RET
	10	43620335	C	T	RET
	15	90631929	T	G	IDH2
	17	7577106	G	A	TP53
132	1	120459122	C	T	NOTCH2
	13	32937360	A	C	BRCA2
	16	23641752	A	G	PALB2
	17	7574003	G	A	TP53
134	9	98270633	G	C	PTCH1
	17	7577610	T	C	TP53
135	2	212578302	C	T	ERBB4
	10	43597793	G	A	RET
	17	7577090	C	G	TP53
136	13	32931977	TT	-	BRCA2
137	5	67588148	G	A	PIK3R1
	10	104860838	A	G	NT5C2
	22	29091225	C	G	CHEK2
139	3	178927980	T	C	PIK3CA
	17	7578265	A	G	TP53
	19	10600396	C	A	KEAP1
140	9	135772002	T	C	TSC1
	11	108175462	G	A	ATM
	17	7577557	A	G	TP53
	17	41244778	TAAC	-	BRCA1
141	3	47127714	G	A	SETD2
	7	140453136	A	T	BRAF
	9	135786904	A	G	TSC1
142	3	178952085	A	G	PIK3CA
	17	7574017	C	A	TP53
	17	37873580	A	G	ERBB2
143	1	120548168	G	T	NOTCH2
	10	43601840	C	T	RET
	19	1223125	C	G	STK11
144	3	47162053	A	G	SETD2
	9	139399216	C	T	NOTCH1
	13	32913262	GT	-	BRCA2
145	9	98270607	G	C	PTCH1
	17	41197729	T	C	BRCA1
	19	1223125	C	G	STK11
	19	17945807	T	G	JAK3
146	17	41223202	A	G	BRCA1
	17	56787293	G	A	RAD51C
147	4	1804675	G	A	FGFR3
	9	135786904	A	G	TSC1
	17	7577121	G	A	TP53
150	4	153247289	G	C	FBXW7
	5	56111742	C	G	MAP3K1
151	9	139399454	C	G	NOTCH1
	13	28597546	C	A	FLT3
152	13	28597588	T	C	FLT3
	17	7578263	G	A	TP53
153	17	7577570	C	T	TP53
156	3	47162195	C	A	SETD2
	6	161413044	-	CCG	MAP3K4
	17	7577139	G	A	TP53
	17	29585422	A	T	NF1
159	2	225368457	C	G	CUL3
	22	41553269	G	A	EP300
160	2	29445223	C	T	ALK
	10	123353315	C	G	FGFR2
	17	7579394	C	-	TP53
	17	56798131	A	G	RAD51C
161	2	209108317	C	T	IDH1
	12	25398284	C	T	KRAS
163	17	7578370	C	A	TP53
164	17	7578546	-	G	TP53
165	1	120548027	G	T	NOTCH2
	6	161518155	C	A	MAP3K4
	7	148507464	C	T	EZH2
166	2	178098963	T	G	NFE2L2
	5	35876188	C	T	IL7R
	17	7578407	G	C	TP53
169	3	178921553	T	A	PIK3CA
	9	139399426	T	C	NOTCH1
	13	48939053	TT	-	RB1
	17	7579447	A	-	TP53
172	4	153247366	C	G	FBXW7
	9	135786904	A	G	TSC1
	11	69466033	C	T	CCND1
	17	7577090	C	G	TP53
174	9	135772892	C	-	TSC1
175	2	225346624	CT	-	CUL3
	4	1808883	C	T	FGFR3
	5	112151259	C	T	APC
	5	112179014	T	C	APC
	5	176523164	A	G	FGFR4
	8	128750639	C	T	MYC
	17	7577539	G	-	TP53
	17	41222996	C	G	BRCA1
176	12	56482420	G	A	ERBB3
	17	7579420	G	-	TP53
177	17	7578551	AGT	TA	TP53
178	17	7578194	G	A	TP53
	17	7579311	C	A	TP53
179	3	47079245	T	C	SETD2
	13	48881520	T	-	RB1
	17	7577518	T	A	TP53
181	4	55602710	G	A	KIT
182	5	112173917	C	T	APC
	6	117662601	C	A	ROS1
	9	21971111	G	A	CDKN2A
	10	43597793	G	A	RET
	17	7578508	C	T	TP53
183	3	178936082	G	A	PIK3CA
	4	153249510	C	A	FBXW7
	16	3830796	C	T	CREBBP
	17	7577018	C	A	TP53
	17	7578479	G	A	TP53
184	5	112178001	G	A	APC
	12	25398284	C	T	KRAS
	13	48936983	C	T	RB1
	17	7578479	G	T	TP53
	19	1226620	C	T	STK11
185	5	149502735	G	A	PDGFRB
	7	128849189	G	A	SMO
	10	89720708	T	C	PTEN
	17	29661966	-	T	NF1
	19	15272375	G	A	NOTCH3
188	9	5044512	TT	-	JAK2
	9	21974792	G	T	CDKN2A
	9	133760465	G	T	ABL1
	12	56489535	G	T	ERBB3
	17	7578190	T	C	TP53
	17	37866641	G	T	ERBB2
	19	11144147	G	T	SMARCA4
	20	57428808	C	A	GNAS
195	3	178937447	G	A	PIK3CA
	6	117724349	T	G	ROS1
	10	123263394	C	T	FGFR2
196	1	120547990	C	T	NOTCH2
	3	41266101	C	G	CTNNB1
	5	112176669	C	G	APC
	9	5080240	A	G	JAK2
	13	49039470	C	G	RB1
	17	7578442	T	C	TP53
197	1	65332664	A	T	JAK1
	1	120611956	G	C	NOTCH2
	10	43597793	G	A	RET
	11	108160457	T	A	ATM
199	7	55241707	G	T	EGFR
	7	55249005	G	T	EGFR
	10	43600607	C	A	RET
	12	56490587	T	C	ERBB3
	13	48919331	G	T	RB1
	17	7578406	C	T	TP53
	17	7579705	C	T	TP53
	19	41725307	C	T	AXL
200	4	55603372	G	T	KIT
	12	56482552	G	A	ERBB3
	16	23646375	C	A	PALB2
	17	7577094	G	A	TP53
201	4	153258983	G	A	FBXW7
	9	133760000	G	C	ABL1
	12	25398285	C	T	KRAS
	17	7578190	T	C	TP53
	18	48604750	G	T	SMAD4
202	1	11303288	G	A	MTOR
	1	120497840	A	T	NOTCH2
	9	135776146	G	A	TSC1
	9	139401004	C	T	NOTCH1
	10	123353315	C	G	FGFR2
	17	7578457	C	T	TP53
	17	37872576	C	G	ERBB2
204	1	11298078	G	A	MTOR
	2	209108317	C	T	IDH1
	5	56111742	C	G	MAP3K1
	5	56179400	G	A	MAP3K1
	6	117677806	A	G	ROS1
	7	116339770	T	G	MET
	7	140501275	T	C	BRAF
	17	7578449	CC	AA	TP53
	17	41258497	A	T	BRCA1
	19	10610685	C	T	KEAP1
	19	41727824	T	C	AXL
205	1	120465273	A	T	NOTCH2
	6	152163853	G	T	ESR1
	17	7578211	C	A	TP53
	19	10602773	GCAGCA	-	KEAP1
206	17	29422352	T	-	NF1
	19	18266699	C	T	PIK3R2
207	1	27100181	-	GCA	ARID1A
	4	55593464	A	C	KIT
	16	23637664	C	T	PALB2
	18	48591889	A	G	SMAD4
	19	17945723	C	T	JAK3
208	8	32453511	A	-	NRG1
	17	7578406	C	T	TP53
	20	57429627	C	A	GNAS
210	7	116436092	G	A	MET
	17	7577534	C	A	TP53
	19	17949138	C	A	JAK3
211	2	178098973	C	G	NFE2L2
	2	215646042	T	C	BARD1
	3	52623161	C	T	PBRM1
	9	21971120	G	A	CDKN2A
	9	139403384	G	A	NOTCH1
	16	3900336	C	T	CREBBP
	17	7577120	C	A	TP53
	19	39215150	G	A	ACTN4
213	3	178936082	G	A	PIK3CA
	9	21971111	G	A	CDKN2A
	11	534288	C	T	HRAS
	16	396918	G	T	AXIN1
	17	29552200	A	G	NF1
	18	18624074	T	C	ROCK1
214	1	156846336	C	T	NTRK1
	3	52437444	G	C	BAP1
	5	112173528	G	T	APC
	5	112176156	A	G	APC
	6	117888100	C	T	GOPC
	13	32930651	G	A	BRCA2
	16	3778172	C	A	CREBBP
	17	7578205	C	A	TP53
215	3	47061326	G	A	SETD2
	5	149501544	G	A	PDGFRB
	7	55269456	C	T	EGFR
	9	135781005	G	C	TSC1
	9	135786904	A	G	TSC1
	12	25398284	C	T	KRAS
	13	32890650	G	A	BRCA2
	17	7577022	G	A	TP53
216	1	120548182	C	T	NOTCH2
	18	42643270	G	T	SETBP1
	19	15271730	G	C	NOTCH3
217	10	123353315	C	G	FGFR2
	18	42532631	A	G	SETBP1
218	2	16082820	G	T	MYCN
	2	29462691	G	A	ALK
	3	47127776	G	T	SETD2
	7	140501213	C	T	BRAF
	9	135772031	C	A	TSC1
	12	46287416	G	A	ARID2
	13	48954210	C	T	RB1
	19	18266699	C	T	PIK3R2
	20	57415292	C	A	GNAS
219	2	225376097	T	C	CUL3
	5	35867465	C	A	IL7R
	9	5069124	C	A	JAK2
	11	108128226	G	T	ATM
	17	7578463	C	G	TP53
	19	11144147	G	T	SMARCA4
220	9	135786904	A	G	TSC1
	18	18586676	G	C	ROCK1
222	7	148525904	C	G	EZH2
	13	48953760	C	T	RB1
223	3	47079245	T	C	SETD2
	5	149513542	C	T	PDGFRB
	9	135772927	G	C	TSC1
	10	89685281	C	G	PTEN
226	2	215595164	G	A	BARD1
	19	15290897	C	T	NOTCH3
	22	41527628	A	G	EP300
227	1	156785624	G	T	NTRK1
	11	108206666	A	T	ATM
	11	108235879	C	T	ATM
	17	7578402	G	C	TP53
	17	29552200	A	G	NF1
	19	17949138	C	A	JAK3
	22	41573672	C	T	EP300
228	2	29416328	G	A	ALK
	2	111907627	T	C	BCL2L11
	7	116381030	G	T	MET
	19	11150218	C	T	SMARCA4
	22	41523549	G	C	EP300
	22	41527475	G	A	EP300
229	1	120548173	C	T	NOTCH2
	7	128843237	C	A	SMO
	9	135772927	G	C	TSC1
	10	43597793	G	A	RET
	17	7579882	C	G	TP53
	17	29528490	G	A	NF1
230	2	178097244	A	G	NFE2L2
	6	161413044	-	CCG	MAP3K4
	10	43596033	G	A	RET
	15	99486178	G	C	IGF1R
	17	7577132	C	-	TP53
	17	41219683	G	T	BRCA1
	17	56811489	T	C	RAD51C
	19	41727824	T	C	AXL
232	3	52439842	-	TT	BAP1
	9	98270504	C	A	PTCH1
233	2	16086208	C	G	MYCN
	16	23646942	T	C	PALB2
	17	40481781	C	T	STAT3
	19	10610685	C	T	KEAP1
	19	15289934	T	C	NOTCH3
235	9	133760961	G	A	ABL1
	13	32972548	C	T	BRCA2
	19	1223125	C	G	STK11
	19	18266699	C	T	PIK3R2
236	1	27023849	G	A	ARID1A
	1	120548200	C	A	NOTCH2
	10	123353315	C	G	FGFR2
	13	28626718	A	C	FLT3
	17	7572986	G	A	TP53
	18	42281486	G	T	SETBP1
	19	1207203	G	-	STK11
238	3	47079245	T	C	SETD2
	4	55146643	A	G	PDGFRA
	4	153244199	G	A	FBXW7
	9	98211572	T	A	PTCH1
	16	3830820	GTTGG	-	CREBBP
	17	7578183	-	GGCT	TP53
	18	42456542	A	G	SETBP1
239	1	120462032	C	T	NOTCH2
	1	120539680	C	T	NOTCH2
	6	117631302	G	A	ROS1
	10	89720670	G	T	PTEN
	17	7577570	C	T	TP53
240	3	10183805	G	T	VHL
	3	52584605	C	T	PBRM1
	4	1808395	A	G	FGFR3
	7	116436092	G	A	MET
	13	32915333	G	A	BRCA2
	17	7577581	A	C	TP53
	17	29556857	T	G	NF1
	19	1223125	C	G	STK11
	20	57430368	C	T	GNAS
241	8	32621705	A	G	NRG1
	17	7577548	C	A	TP53
242	2	209108202	A	G	IDH1
	7	148524346	C	T	EZH2
	9	98211572	T	A	PTCH1
	9	133756051	G	A	ABL1
	12	56493492	G	A	ERBB3
	13	28592686	G	T	FLT3
	17	7578403	C	A	TP53
	19	15276230	C	A	NOTCH3
244	7	55227854	G	A	EGFR
	8	32579528	T	C	NRG1
	11	108155055	T	C	ATM
	17	7578394	T	A	TP53
	17	41246737	C	T	BRCA1
	20	57429627	C	A	GNAS
245	1	27056209	C	A	ARID1A
	3	47125608	-	A	SETD2
	4	55133546	G	A	PDGFRA
	5	35867413	C	A	IL7R
	12	25380275	T	A	KRAS
	17	7578265	A	T	TP53
246	1	65312353	C	T	JAK1
	2	16082800	T	C	MYCN
	6	117718231	T	-	ROS1
	6	117725448	T	G	ROS1
	13	48936983	C	T	RB1
	17	7577120	C	T	TP53
	18	18603588	T	G	ROCK1
247	10	89717715	-	A	PTEN
	11	108168053	A	G	ATM
	12	25378562	C	T	KRAS
	17	7578460	A	G	TP53
	19	18271287	C	T	PIK3R2
249	12	58144863	C	T	CDK4
	20	57429627	C	A	GNAS
250	1	11182050	G	A	MTOR
	1	27023656	CT	-	ARID1A
	2	212989558	C	A	ERBB4
	3	178927980	T	C	PIK3CA
	4	153245493	C	T	FBXW7
	9	133759566	G	A	ABL1
	9	139391290	A	G	NOTCH1
	12	46230571	C	T	ARID2
	16	343657	G	A	AXIN1
	17	7576927	C	A	TP53
	17	7578265	A	G	TP53
	17	7578389	G	A	TP53
	19	15288715	C	T	NOTCH3
	19	18266699	C	T	PIK3R2
	19	18273105	G	-	PIK3R2
251	5	67588148	G	A	PIK3R1
252	1	27099098	C	T	ARID1A
	1	120548200	C	A	NOTCH2
	2	215595164	G	A	BARD1
	5	56168832	G	T	MAP3K1
	5	176520138	G	C	FGFR4
	9	133759662	C	T	ABL1
	13	48951166	C	A	RB1
	17	7574021	C	A	TP53
	17	7578291	T	G	TP53
	17	41256237	G	A	BRCA1
	18	42529889	C	T	SETBP1
253	2	11364525	C	A	ROCK2
	2	29450509	C	T	ALK
	6	117725448	T	G	ROS1
	9	133760136	G	A	ABL1
	11	108121747	G	A	ATM
255	1	11206816	T	C	MTOR
	1	120548095	C	T	NOTCH2
	3	47079245	T	C	SETD2
	3	178936091	G	A	PIK3CA
	4	1804786	G	A	FGFR3
	4	55593464	A	C	KIT
	11	108175462	G	A	ATM
	17	41203079	C	T	BRCA1
256	1	120548101	G	A	NOTCH2
	4	1806605	G	A	FGFR3
	4	55146643	A	G	PDGFRA
	9	139390878	G	A	NOTCH1
	13	32907359	A	C	BRCA2
	19	18266699	C	T	PIK3R2
257	4	55594068	G	A	KIT
	13	28622544	T	A	FLT3
	17	41223202	A	G	BRCA1
258	1	65330619	G	A	JAK1
	5	112137003	G	A	APC
259	9	98212185	C	T	PTCH1
	10	43606865	A	T	RET
	10	43610119	G	A	RET
	12	56487560	A	T	ERBB3
	17	7579317	A	G	TP53
	19	17942528	GC	-	JAK3
	22	29130552	G	A	CHEK2
260	1	8921446	C	G	ENO1
	2	29917727	T	C	ALK
	5	112162891	C	T	APC
	5	112176057	G	A	APC
	12	25398284	C	T	KRAS
	17	7578555	C	T	TP53
	19	1221319	C	T	STK11
261	5	112162944	G	C	APC
	9	133759682	C	T	ABL1
	13	32900663	G	A	BRCA2
	17	7576852	C	A	TP53
	19	15272116	G	A	NOTCH3
262	2	16086208	C	G	MYCN
	6	117631302	G	A	ROS1
	8	32620746	A	G	NRG1
	9	98229479	T	C	PTCH1
	9	98278972	T	C	PTCH1
263	13	28623550	G	A	FLT3
	17	7578541	A	C	TP53
	17	29552200	A	G	NF1
	20	57429070	C	T	GNAS
264	1	120512355	G	A	NOTCH2
	2	29416743	G	C	ALK
	9	98209328	T	C	PTCH1
	10	43610119	G	A	RET
	11	108203604	C	G	ATM
265	1	8930542	T	C	ENO1
	1	27100181	-	GCA	ARID1A
	7	116339827	C	T	MET
	10	43610119	G	A	RET
	10	89717712	C	T	PTEN
	12	46298776	C	G	ARID2
	17	7578544	GC	-	TP53
	19	41727824	T	C	AXL
267	1	120548173	C	T	NOTCH2
	3	47129640	-	T	SETD2
	8	32620746	A	G	NRG1
	18	42531556	C	T	SETBP1
	19	15295153	C	T	NOTCH3
268	1	156846336	C	T	NTRK1
	6	117622231	G	T	ROS1
	9	133730221	A	G	ABL1
	9	133760303	A	G	ABL1
	14	105246551	C	T	AKT1
	17	7577553	AT	-	TP53
	19	15271867	G	A	NOTCH3
	20	57484421	G	A	GNAS
	22	41546173	C	A	EP300
269	3	178916944	A	G	PIK3CA
270	7	55248995	G	A	EGFR
	10	43604665	G	A	RET
	11	533874	T	A	HRAS
	11	108139302	C	G	ATM
	16	3779040	G	C	CREBBP
271	1	11303288	G	A	MTOR
	1	120548182	C	T	NOTCH2
	2	215645781	C	T	BARD1
	3	41280704	G	A	CTNNB1
	5	149504392	G	A	PDGFRB
	9	98270607	G	C	PTCH1
	9	139401233	C	T	NOTCH1
	16	396853	G	A	AXIN1
	16	23640966	C	T	PALB2
272	9	98270633	G	C	PTCH1
	13	28622544	T	A	FLT3
	17	7574003	G	A	TP53
	19	1226536	G	A	STK11
	19	18272170	A	G	PIK3R2
273	2	178096634	G	A	NFE2L2
	17	7579310	A	C	TP53
274	4	55152093	A	T	PDGFRA
	4	55593464	A	C	KIT
	5	56179400	G	A	MAP3K1
	9	139400980	G	A	NOTCH1
275	2	11337338	G	A	ROCK2
	2	209108317	C	T	IDH1
	6	117622184	G	C	ROS1
	6	117622188	T	G	ROS1
	6	117622233	C	T	ROS1
	9	98209216	G	A	PTCH1
	12	25398284	C	T	KRAS
277	1	11303288	G	A	MTOR
	3	52443867	T	-	BAP1
	4	55592028	C	G	KIT
278	3	47163131	C	T	SETD2
	3	52436839	C	T	BAP1
	5	35874575	C	T	IL7R
	17	41246737	C	T	BRCA1
	19	18266699	C	T	PIK3R2
280	1	120548200	C	A	NOTCH2
	1	156837978	C	A	NTRK1
	5	35874575	C	T	IL7R
	11	108160457	T	A	ATM
	20	57429627	C	A	GNAS
281	7	55242465	AATTAAGAGAAGCA	-	EGFR
	9	139391491	G	C	NOTCH1
	13	49050852	C	T	RB1
	17	7578208	T	C	TP53
285	5	35874575	C	T	IL7R
	5	56111752	A	T	MAP3K1
	7	128843429	C	T	SMO
	8	38285911	G	T	FGFR1
	8	38285912	A	C	FGFR1
	10	43600607	C	A	RET
	10	43609054	G	C	RET
	16	23647094	C	G	PALB2
	17	7578461	C	A	TP53
	19	18266699	C	T	PIK3R2
	20	57430156	C	T	GNAS
286	1	156837969	G	A	NTRK1
	2	212286768	C	A	ERBB4
	3	41266124	A	G	CTNNB1
	4	55141083	C	G	PDGFRA
	8	128751058	G	A	MYC
	12	46123899	TACTT	-	ARID2
	17	7578190	T	C	TP53
	18	18586498	T	G	ROCK1
287	3	47079245	T	C	SETD2
	10	43596033	G	A	RET
	10	43610119	G	A	RET
	10	43620335	C	T	RET
288	5	35874575	C	T	IL7R
	11	108235879	C	T	ATM
	17	7577105	G	-	TP53
289	1	120464880	C	T	NOTCH2
	2	178096634	G	A	NFE2L2
	13	32906558	T	A	BRCA2
	15	66782095	A	C	MAP2K1
	22	41574665	G	A	EP300
290	1	11259346	G	A	MTOR
	2	29917727	T	C	ALK
	5	35874575	C	T	IL7R
	6	117622184	G	C	ROS1
	6	117622188	T	G	ROS1
	6	117622233	C	T	ROS1
	7	128843306	G	A	SMO
	8	32621325	G	A	NRG1
	11	108206666	A	T	ATM
	18	18600179	T	C	ROCK1
	19	1226500	C	T	STK11
	22	41527628	A	G	EP300
																								_
